# Supplementary material for: Assessment of Genetic Diversity and Population Structure in Iranian Cannabis Germplasm
Source: PubMed Central journal article supplement (PMC5688169; doi:10.1038/s41598-017-15816-5), 2017-11-15
Supplement: 41598_2017_15816_MOESM1_ESM.pdf [file 41598_2017_15816_MOESM1_ESM.pdf]

# **Assessment of Genetic Diversity and Population Structure in Iranian Cannabis Germplasm**

## **Supplementary Tables 4, 5 and 6**

## **Supplementary Figures S1, S2, S3, S4 and S5**

Aboozar Soorni<sup>1,2</sup>, Mohammad Reza Fatahi<sup>1</sup>, David C. Haak<sup>3</sup>, Seyed Alireza Salami<sup>1\*</sup>, Aureliano Bombarely<sup>2\*</sup>

<sup>1</sup>Department of Horticulture Sciences, Faculty of Agriculture, University of Tehran, Karaj 31587, Iran

<sup>2</sup>Department of Horticulture, Virginia Tech, Blacksburg, VA 24061, U.S.A.

<sup>3</sup>Department of Plant Pathology, Physiology, and Weed Science, Virginia Tech, Blacksburg, VA 24061, U.S.A.

\*To whom correspondence should be addressed.

### **Authors E-mail**

Aboozar Soorni: [aboozar.soorni@gmail.com](mailto:aboozar.soorni@gmail.com)

Mohammad Reza Fattahi: [fattahi@ut.ac.ir](mailto:fattahi@ut.ac.ir)

David Haak: [dhaak@vt.edu](mailto:dhaak@vt.edu)

Seyed Alireza Salami: [asalami@ut.ac.ir](mailto:asalami@ut.ac.ir)

Aureliano Bombarely: [aurebg@vt.edu](mailto:aurebg@vt.edu)

| All loci   | Mean    | 0.025  | 0.975   | Nm      |
|------------|---------|--------|---------|---------|
| $\theta_1$ | 0.01289 | 0.0112 | 0.01453 |         |
| $\theta_2$ | 0.0053  | 0.0036 | 0.00693 |         |
| M2->1      | 25      | 8      | 41.3    | 0.08056 |
| M1->2      | 999     | 948.7  | 982     | 1.32367 |

Table S4: Migration rates

|             |                                                                                |
|-------------|--------------------------------------------------------------------------------|
| Populations | Individuals                                                                    |
| pop2        | ArdF,ArdM                                                                      |
| pop3        | PirF,PirM                                                                      |
| pop6        | NhvF,SanF                                                                      |
| pop7        | NrzF,NrzM                                                                      |
| pop8        | GahvF,GahvM                                                                    |
| pop10       | UrmF,UrmM                                                                      |
| pop11       | RmhzM,GonbF,RmhZF,SaadM                                                        |
| pop12       | NhvM,Sam02F,Sam02M                                                             |
| pop13       | ArkF,ArkM                                                                      |
| pop16       | KashM,DezM,DshmM,KrshM,BshM,FrsM,Dez02M,<br>MshdM,SanM,SavM,QomM,RashM, San02M |
| pop17       | AbhF,AbhM                                                                      |
| pop18       | BamM,KrmnM,MalM,ZahM,ShrzM,Qzv02M                                              |
| pop19       | FrsF,DezF,BshF,BamF,DshmF,KrmnF,MalF,MshdF,SaadF,<br>KrshF,MahlF,SanF,Dez02F   |
| pop20       | QomF,AfgF,EsF,Qzv02F,SavF,ZahF,RashF                                           |

Table S5: clustering of samples into populations by fineSTRUCTURE

| Groups                      | Source of variation             | df  | Variance components | Percentage of variation | <i>F-statistics</i>     |
|-----------------------------|---------------------------------|-----|---------------------|-------------------------|-------------------------|
| fastSTRUCTURE (2 Clusters)  | Among groups                    | 1   | 146.84807           | 5.53                    | $F_{CT} = 0.05525^{**}$ |
|                             | Among populations within groups | 31  | 36.73616            | 1.38                    | $F_{SC} = 0.01463^{**}$ |
|                             | Within populations              | 105 | 2474.11931          | 93.09                   | $F_{ST} = 0.06908^{**}$ |
| FineSTRUCTURE (19 Clusters) | Among groups                    | 18  | 137.71115           | 3.24                    | $F_{CT} = 0.05283^{**}$ |
|                             | Among populations within groups | 14  | 26.63795            | 1.02                    | $F_{SC} = 0.01079^*$    |
|                             | Within populations              | 105 | 2495.5299           | 95.74                   | $F_{ST} = 0.04261^{**}$ |

Table S6: Analysis of molecular variance (AMOVA) for 29,647 SNPs identified for 68 Iranian individuals, including one Afghanistan sample.

## Transition/Transversion

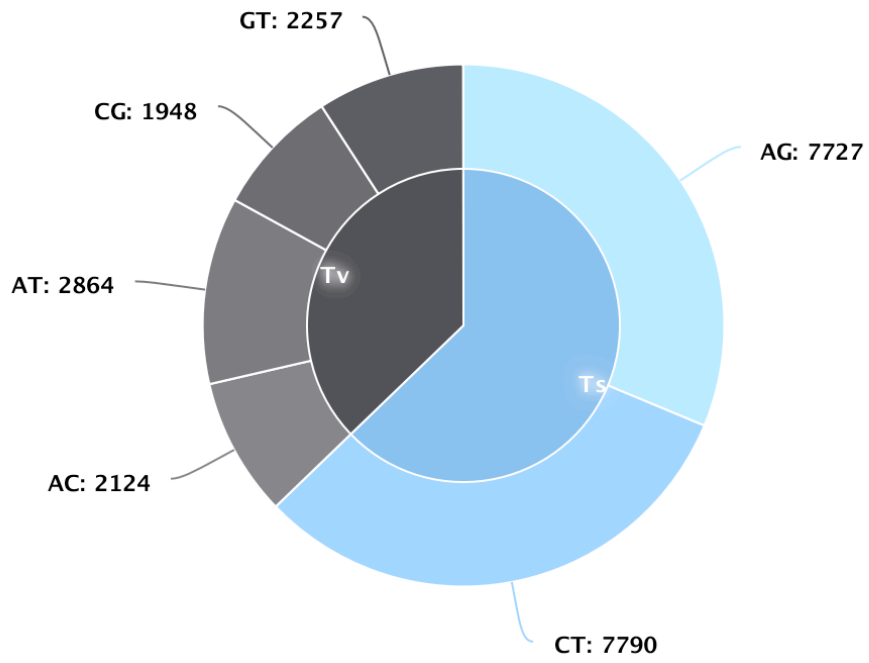

Figure S1: Estimation of the Transition/Transversion Rate

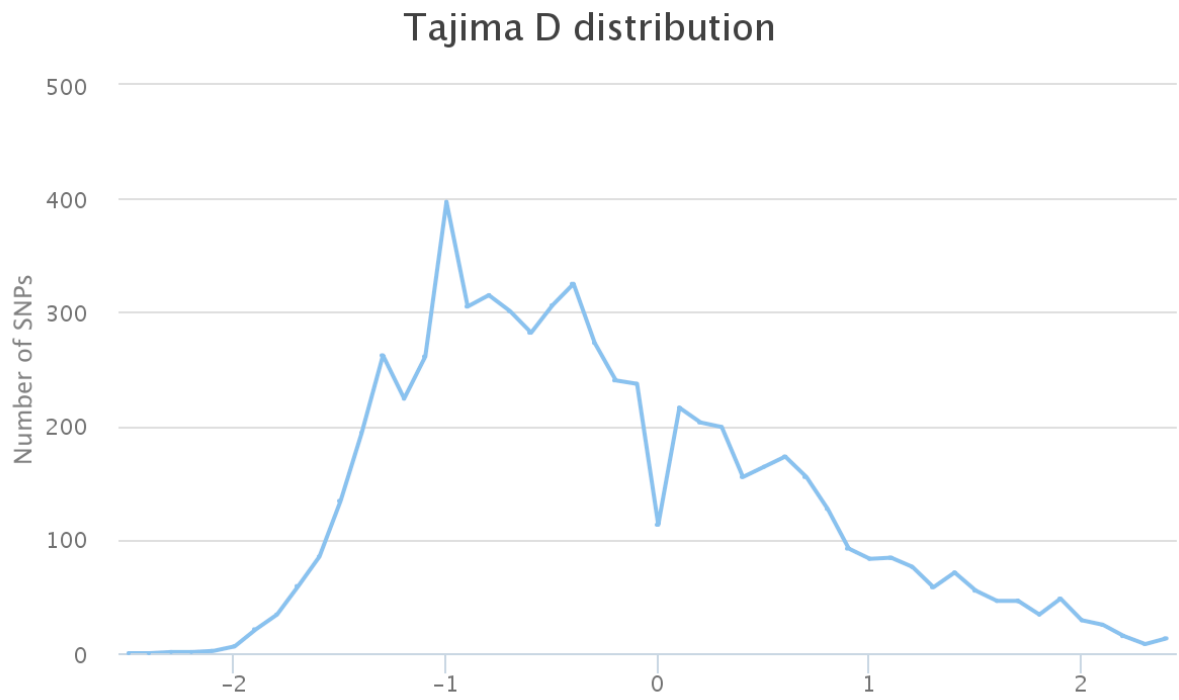

Figure S2: Distribution of Tajima's D value along SNPs

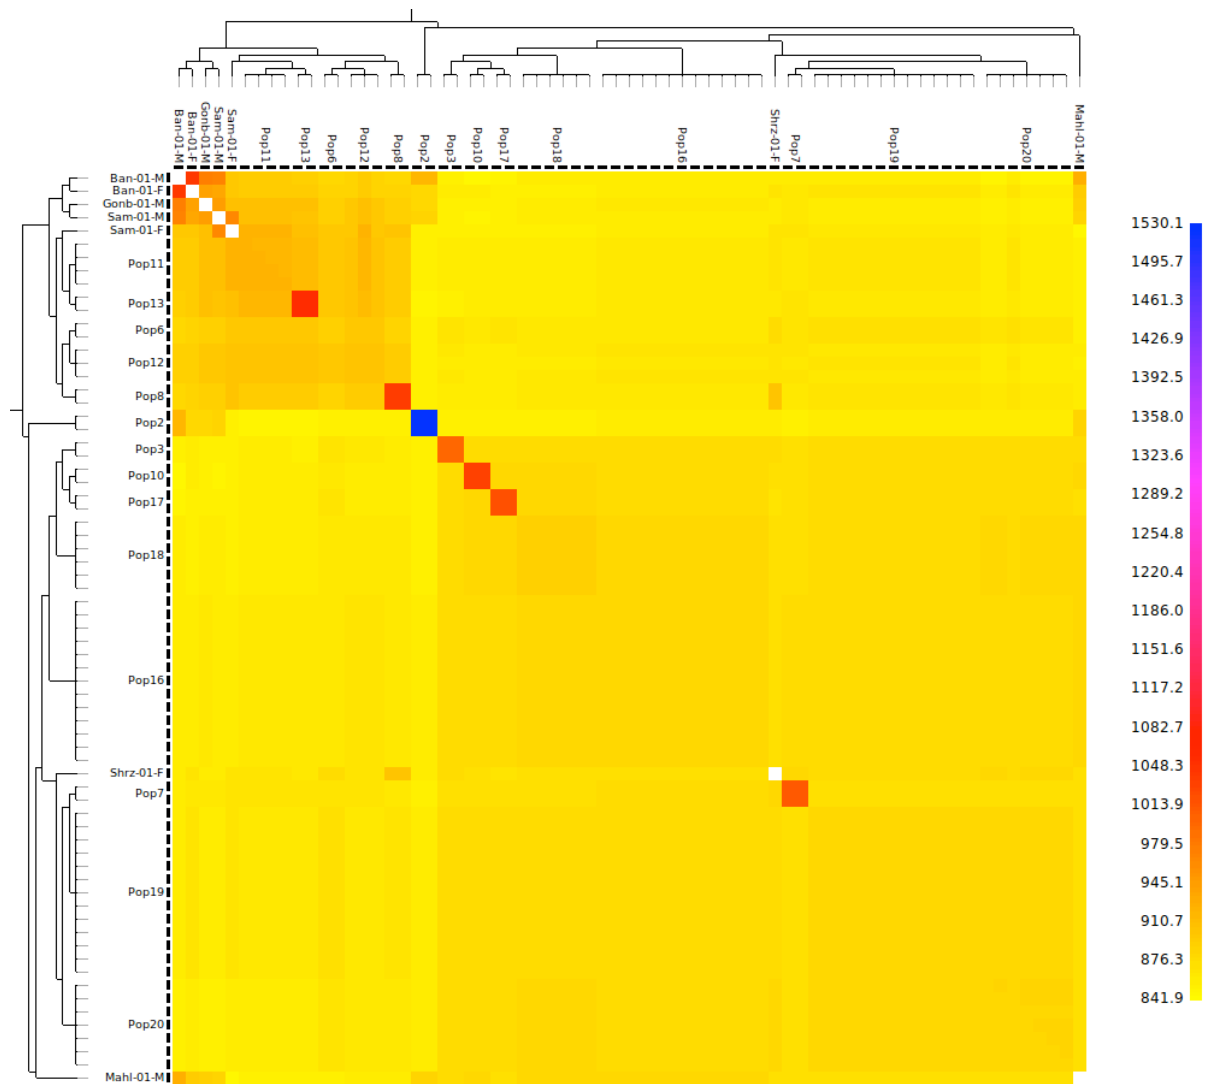

Figure S3: The fineSTRUCTURE clustering with aggregated coancestry matrix for 69 Iranian samples

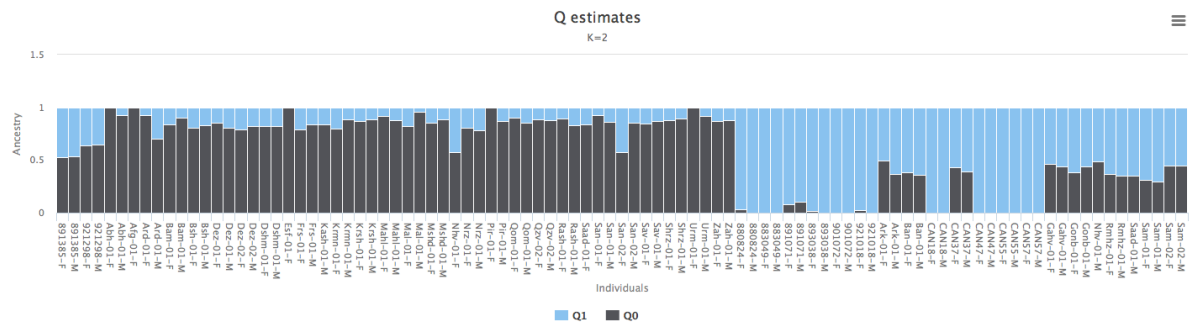

Figure S4: Population structure of Iranian collections (95 samples) estimated using the fastSTRUCTURE admixture model at  $K = 2$ .



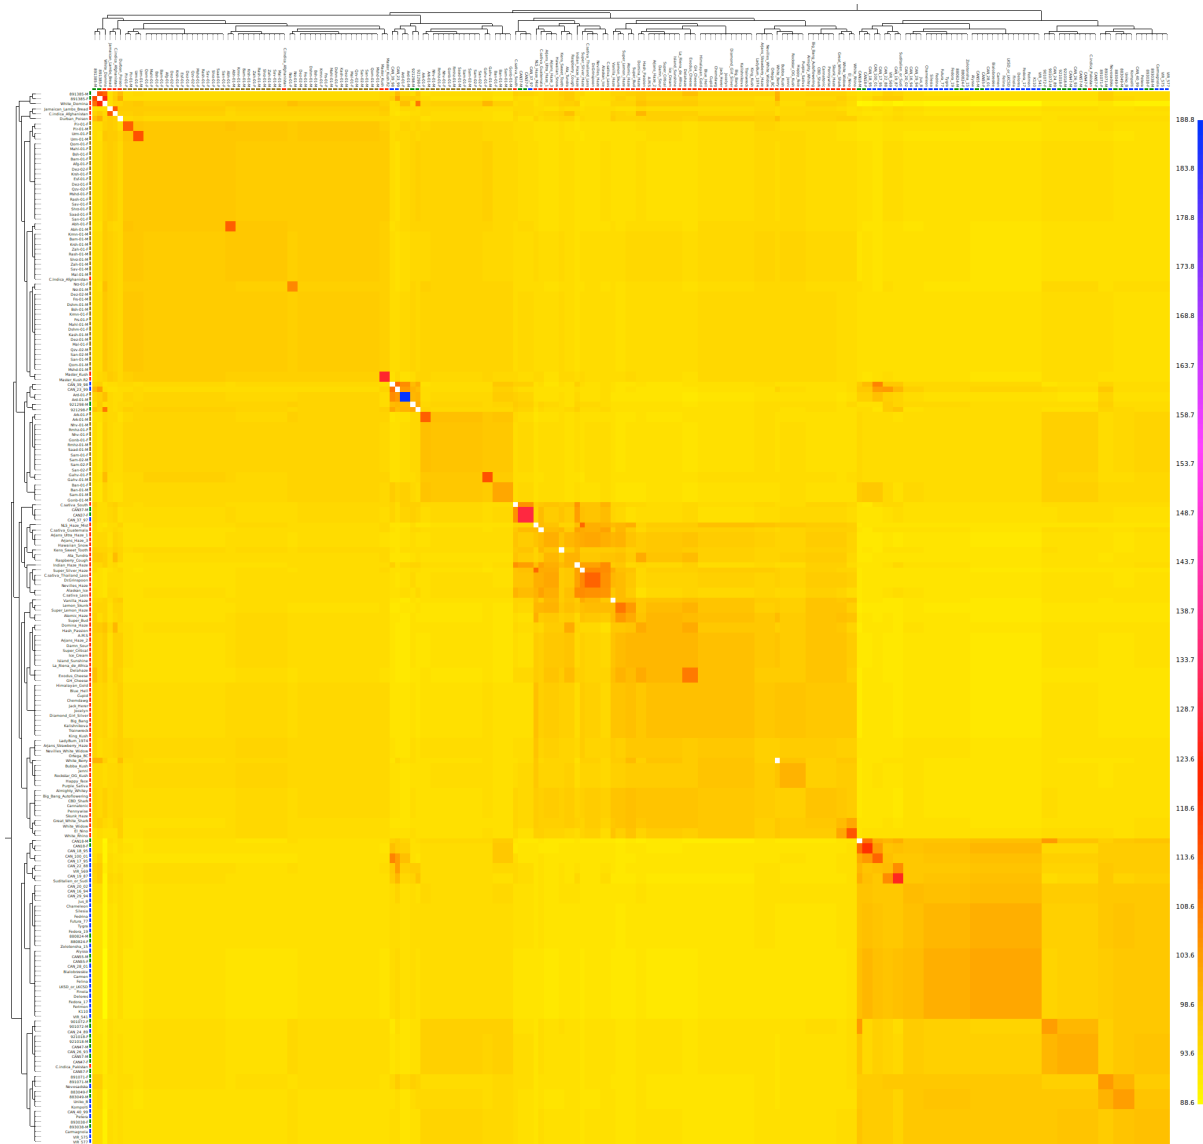

Figure S5: The cluster-level coancestry heat map for 95 samples from Iranian collection, 43 hemp and 71 marijuana samples.
